# Supplementary material
Source: publisher site journal article supplement (https://static.cambridge.org/content/id/urn:cambridge.org:id:article:S0007114520002391/resource/name/S0007114520002391supp001.docx)
Supplement: Supplementary file 1 [file S0007114520002391supp001.docx]

Supplementary table 2. Hazard ratio for all causes and cardiovascular mortality by cardiovascular morbidity, adiposity, sedentary time, alcohol use and presence of cancer.

| **All-cause Mortality** |  | Deaths (persons-year) |  | Survived  (persons-year) |  | HR (95% CI) |
| --- | --- | --- | --- | --- | --- | --- |
| °CHF |  | 297 (1185.2) |  | 456 (2769.4) |  | 1.72 (1.46, 2.02) |
| °CHD |  | 315 (1498.4) |  | 709 (4497.7) |  | 1.04 (0.89, 1.21) |
| °MI |  | 338 (1600.4) |  | 707 (4496.3) |  | 1.05 (0.91, 1.21) |
| °Stroke |  | 285 (1279.0) |  | 599 (3773.3) |  | 1.32 (1.10, 1.57) |
| +1 CVD condition |  |  |  |  |  | 1.34 (1.12, 1.60) |
| BMI < 21 |  | 44 (165.7) |  | 83 (480.8) |  | 1.31 (0.93, 1.85) |
| 25 ≤ BMI < 30 |  | 269 (1331.5) |  | 551 (3540.2) |  | 0.93 (0.76, 1.13) |
| BMI ≥ 30 |  | 296 (1341.3) |  | 798 (5075.6) |  | 1.29 (1.07, 1.55) |
| 21 ≤ BMI < 25 |  | 152 (685.9) |  | 280 (1734.9) |  | 1 (ref.) |
| Sedentary time (3rd tert.) |  | 202 (912.4) |  | 396 (2648.9) |  | 1.31 (1.08, 1.60) |
| Sedentary time (2nd tert.) |  | 264 (1181.8) |  | 594 (3481.5) |  | 1.22 (1.00, 1.47) |
| Sedentary time (1st tert.) |  | 295 (1430.1) |  | 722 (4701.1) |  | 1 (ref.) |
| *Alcohol (3rd tert.) |  | 71 (384.8) |  | 175 (1067.2) |  | 1.47 (1.15, 1.87) |
| *Alcohol (2nd tert. |  | 73 (342.3) |  | 173 (1065.2) |  | 1.23 (0.96, 1.58) |
| *Alcohol (1st tert.) |  | 76 (391.3) |  | 169 (1151.3) |  | 1 (ref.) |
| Smoking |  | 495 (2334.0) |  | 1049 (6681.3) |  | 1.61 (1.40, 1.86) |
| No smoking |  | 266 (1190.3) |  | 663 (4150.2) |  | 1 (ref.) |
| Cancer |  | 205 (864.3) |  | 315 (1881.8) |  | 0.92 (0.78, 1.09) |
| No cancer |  | 556 (2660.1) |  | 1397 (8949.7) |  | 1 (ref.) |
| **CVD Mortality** |  | Deaths  (persons-year) |  | Survived  (persons-year) |  | HR (95% CI) |
| °CHF |  | 90 (348.8) |  | 663 (3605.7) |  | 2.17 (1.58, 2.98) |
| °CHD |  | 96 (452.4) |  | 928 (5543.7) |  | 1.50 (1.08, 2.07) |
| °MI |  | 99 (463.0) |  | 946 (5633.7) |  | 1.18 (0.88, 1.57) |
| °Stroke |  | 69 (319.3) |  | 815 (4733.1) |  | 1.44 (1.04, 1.99) |
| +1 CVD condition |  |  |  |  |  | 1.50 (1.28, 1.77) |
| BMI < 21 |  | 12 (39.8) |  | 115 (606.7) |  | 1.94 (0.86, 4.40) |
| 25 ≤ BMI < 30 |  | 76 (371.7) |  | 744 (4500.0) |  | 0.99 (0.65, 1.52) |
| BMI ≥ 30 |  | 76 (331.0) |  | 1018 (6085.8) |  | 1.35 (0.92, 1.99) |
| 21 ≤ BMI < 25 |  | 35 (169.0) |  | 397 (2251.8) |  | 1 (ref.) |
| Sedentary time (3rd tert.) |  | 78 (353.5) |  | 613 (3725.5) |  | 1.61 (1.12, 2.32) |
| Sedentary time (2nd tert.) |  | 68 (313.5) |  | 790 (4349.8) |  | 1.23 (0.90, 1.69) |
| Sedentary time (1st tert.) |  | 53 (244.5) |  | 871 (5369.0) |  | 1 (ref.) |
| *Alcohol (3rd tert.) |  | 14 (75.1) |  | 232 (1376.9) |  | 0.95 (0.52, 1.73) |
| *Alcohol (2nd tert. |  | 16 (77.8) |  | 230 (1329.7) |  | 0.95 (0.71, 1.26) |
| *Alcohol (1st tert.) |  | 21 (112.0) |  | 224 (1430.6) |  | 1 (ref.) |
| Smoking |  | 135 (664.2) |  | 865 (5093.2) |  | 1.80 (1.36, 2.38) |
| No smoking |  | 64 (247.3) |  | 1409 (8351.2) |  | 1 (ref.) |
| Cancer |  | 44 (213.0) |  | 476 (2533.0) |  | 0.68 (0.50, 0.91) |
| No cancer |  | 155 (698.5) |  | 1798 (10911.3) |  | 1 (ref.) |
| **Notes: °:** Hazard ratio performed for subjects having the condition vs. subjects without the condition (ref.) in mutually adjusted models, ***:** alcohol hazard ratios performed only among users, **BMI:** Body Mass Index.  All models were adjusted for smoking status, ethnicity, education and mean of systolic and diastolic blood pressure and cancer. | | | | | | |
